# Supplementary material for: Quick, sensitive and specific detection and evaluation of quantification of minor variants by high-throughput sequencing
Source: Royal Society of Chemistry journal article supplement (doi:10.1039/c3mb70334g), 2013-10-30
Supplement: c3mb70334g_2.pdf [file c3mb70334g_2.pdf]

## SUPPLEMENTARY MATERIAL

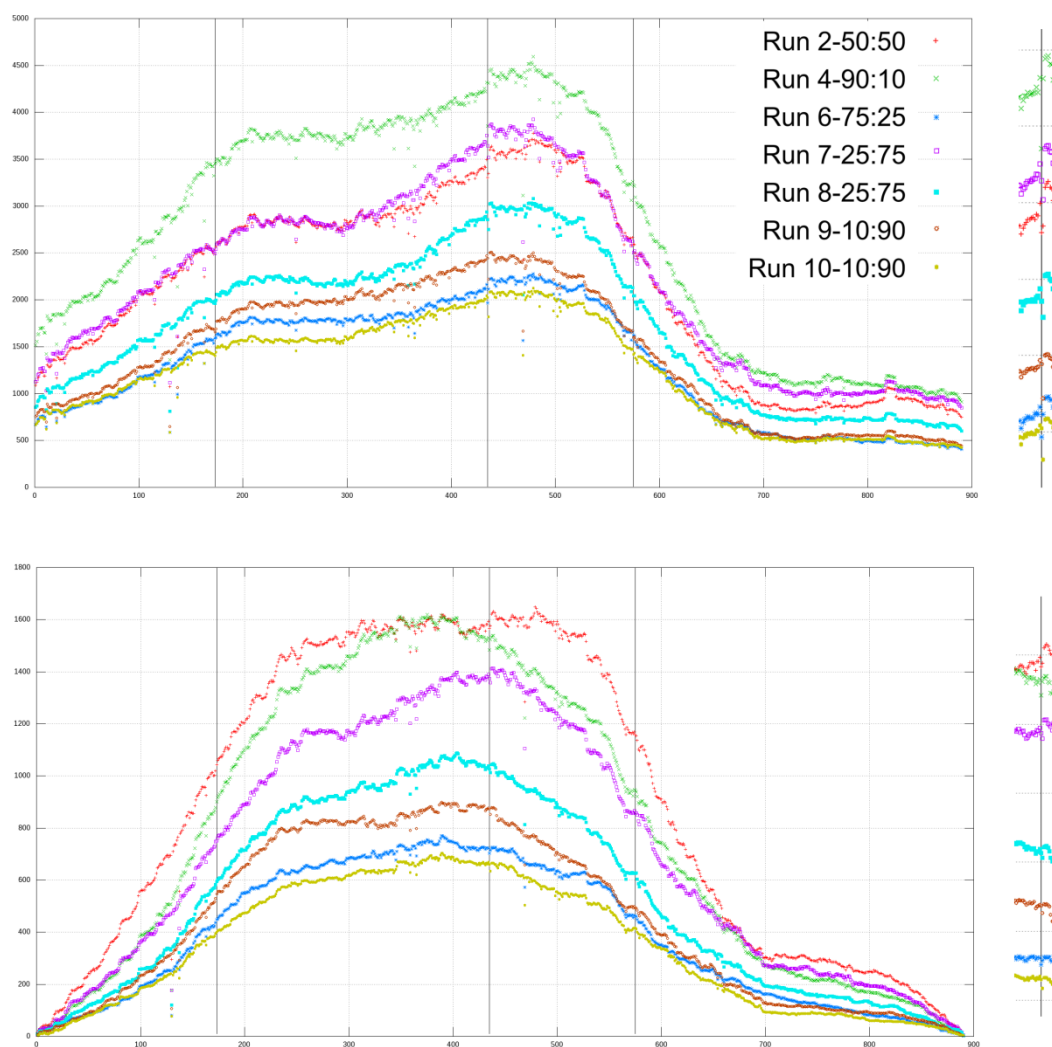

**Figure S1.** Depth of coverage by TMAP (above) and BWA (below) for segment NS. The complete coverage information from TMAP + DiBayes is not available from manufacturer software. The three vertical lines are drawn at positions 173, 435 and 575. An inset is shown on the right for a magnified view of the mapping around position 435
