# Supplementary material for: Quick, sensitive and specific detection and evaluation of quantification of minor variants by high-throughput sequencing
Source: Royal Society of Chemistry journal article supplement (doi:10.1039/c3mb70334g), 2013-10-30
Supplement: c3mb70334g_3.pdf [file c3mb70334g_3.pdf]

Table S1. General sequencing information and statistics

| Run | Influenza A H1N1 DNA sample | Fragmentation method | Sequencing platform | Variant1* : Variant2# | Number of reads | Total bases | Length in bp (Mean ± SD) | Quality score (Mean ± SD) | Average depth of coverage |
|-----|-----------------------------|----------------------|---------------------|-----------------------|-----------------|-------------|--------------------------|---------------------------|---------------------------|
| 1   | NS Segment                  | Enzymatic Shearing   | Ion PGM Sequencer   | 50 : 50               | 31,160          | 1,379,139   | 44± 30                   | 16± 5                     | 420                       |
| 2   | NS Segment                  | Enzymatic Shearing   | Ion PGM Sequencer   | 50 : 50               | 55,806          | 8,958,397   | 161± 66                  | 24± 6                     | 2,800                     |
| 3   | NS Segment                  | Enzymatic Shearing   | Ion PGM Sequencer   | 90 : 10               | 17,021          | 743,200     | 44± 31                   | 16± 5                     | 230                       |
| 4   | NS Segment                  | Enzymatic Shearing   | Ion PGM Sequencer   | 90 : 10               | 65,915          | 12,093,134  | 183± 68                  | 23± 6                     | 3,770                     |
| 5   | NS Segment                  | Enzymatic Shearing   | Ion PGM Sequencer   | 75 : 25               | 36,295          | 1,674,023   | 46± 29                   | 16± 5                     | 520                       |
| 6   | NS Segment                  | Enzymatic Shearing   | Ion PGM Sequencer   | 75 : 25               | 30,977          | 5,705,874   | 184± 66                  | 23± 5                     | 1,780                     |
| 7   | NS Segment                  | Enzymatic Shearing   | Ion PGM Sequencer   | 25 : 75               | 56,713          | 9,898,011   | 175± 68                  | 23± 6                     | 3,100                     |
| 8   | NS Segment                  | Enzymatic Shearing   | Ion PGM Sequencer   | 25 : 75               | 39,973          | 7,258,889   | 182± 65                  | 23± 6                     | 2,270                     |
| 9   | NS Segment                  | Enzymatic Shearing   | Ion PGM Sequencer   | 10 : 90               | 32,105          | 5,989,430   | 187± 66                  | 23± 6                     | 1,870                     |
| 10  | NS Segment                  | Enzymatic Shearing   | Ion PGM Sequencer   | 10 : 90               | 27,361          | 5,205,112   | 190± 65                  | 23± 6                     | 1,620                     |
| 11  | Whole genome‡               | Enzymatic Shearing   | Ion PGM Sequencer   | N/A                   | 67,699          | 6,405,499   | 95± 22                   | 18± 7                     | 470                       |
| 12  | Whole genome                | Enzymatic Shearing   | Ion PGM Sequencer   | N/A                   | 360,161         | 43,519,129  | 121± 23                  | 21± 7                     | 3,200                     |
| 13  | Whole genome                | Sonication           | Ion PGM Sequencer   | N/A                   | 378,491         | 38,897,823  | 103± 32                  | 21± 7                     | 2,870                     |
| 14  | Whole genome                | Nebulization         | Roche GS Junior     | N/A                   | 8,277           | 2,757,743   | 333± 170                 | 31± 7                     | 200                       |

\* Variant1: 173C-435G-575G

# Variant2: 173T-435A-575A

‡ Amplified by 8 gene specific primers
