# Supplementary material for: Quick, sensitive and specific detection and evaluation of quantification of minor variants by high-throughput sequencing
Source: Royal Society of Chemistry journal article supplement (doi:10.1039/c3mb70334g), 2013-10-30
Supplement: c3mb70334g_4.pdf [file c3mb70334g_4.pdf]

| Site | Mixed ratio |      | Run | Var 2 % |       |       |      |       | Var 2 % |       |       |       |        | Run |
|------|-------------|------|-----|---------|-------|-------|------|-------|---------|-------|-------|-------|--------|-----|
|      | Var1        | Var2 |     | DiBaves | TMAP  | BWA   | SNV  | Lofre | DiBaves | TMAP  | BWA   | SNVer | Lofreq |     |
| 173  |             |      |     | 50.57   | 47.39 | 43.02 | 47   | 50.69 | 46.16   | 43.39 | 47.08 | 44.57 | 43.95  |     |
| 435  |             |      |     | 55.3    | 65.1  | 71.52 | 60   | Nil#  | 53.62   | 53.73 | 49.2  | 52.94 | 53.82  |     |
| 575  |             |      |     | 55.03   | 52.88 | 64.19 | 53.7 | 62.74 | 44.13   | 43.31 | 45.9  | 43.31 | 44.68  |     |
| 11   |             |      |     | Nil     | Nil   | 4.76  | Nil  | Nil   | Nil     | Nil   | 2.33  | Nil   | Nil    |     |
| 14   |             |      |     | Nil     | Nil   | Nil   | Nil  | Nil   | Nil     | Nil   | 2.04  | Nil   | Nil    |     |
| 16   |             |      |     | Nil     | 5.66  | 4     | Nil  | Nil   | Nil     | Nil   | 8.82  | Nil   | Nil    |     |
| 17   |             |      |     | Nil     | 5     | 7.69  | Nil  | Nil   | Nil     | 1.11  | 1.19  | 20.42 | Nil    |     |
| 18   |             |      |     | Nil     | Nil   | 4.44  | Nil  | Nil   | Nil     | Nil   | 2.27  | 34.05 | Nil    |     |
| 21   | 50          | 50   | 1   | Nil     | Nil   | 24.39 | Nil  | Nil   | Nil     | Nil   | 1.09  | Nil   | Nil    | 2   |
| 51   |             |      |     | Nil     | Nil   | 6.98  | Nil  | Nil   | Nil     | Nil   | Nil   | Nil   | Nil    |     |
| 130  |             |      |     | Nil     | 14.29 | 11.63 | Nil  | Nil   | Nil     | 2.6   | 5.07  | Nil   | Nil    |     |
| 257  |             |      |     | Nil     | 4.8   | 4.79  | Nil  | Nil   | Nil     | Nil   | Nil   | Nil   | Nil    |     |
| 436  |             |      |     | Nil     | 10.08 | 6.82  | Nil  | Nil   | Nil     | 4.48  | 1.53  | Nil   | Nil    |     |
| 442  |             |      |     | Nil     | 3.46  | 1.53  | Nil  | Nil   | Nil     | Nil   | Nil   | Nil   | Nil    |     |
| 757  |             |      |     | Nil     | Nil   | 4.24  | Nil  | Nil   | Nil     | 4.83  | 4.07  | Nil   | Nil    |     |
| 864  |             |      |     | Nil     | 4.52  | 21.97 | Nil  | Nil   | Nil     | 8.12  | 10.9  | 1.12  | Nil    |     |
| 877  |             |      |     | Nil     | 16.82 | 29.03 | Nil  | Nil   | Nil     | 1.03  | 2.13  | Nil   | Nil    |     |
| 173  |             |      |     | 20.62   | 14.56 | 8     | Nil  | 16.79 | 9.01    | 8.4   | 10.32 | Nil   | 8.36   |     |
| 435  |             |      |     | 12.68   | 20    | 40.38 | 14.4 | Nil   | 12.45   | 13.95 | 11.33 | 12.67 | 14.01  |     |
| 575  |             |      |     | 13.25   | 12.31 | 18.03 | Nil  | Nil   | 8.03    | 8.04  | 9.12  | Nil   | Nil    |     |
| 11   |             |      |     | Nil     | Nil   | Nil   | Nil  | Nil   | Nil     | 1.26  | 8.57  | 43.52 | Nil    |     |
| 14   |             |      |     | Nil     | Nil   | Nil   | Nil  | Nil   | Nil     | Nil   | 2.5   | 23.34 | Nil    |     |
| 16   |             |      |     | Nil     | 3.33  | Nil   | Nil  | Nil   | Nil     | Nil   | Nil   | 20.94 | Nil    |     |
| 17   |             |      |     | Nil     | 5     | 6.25  | Nil  | Nil   | Nil     | 1.09  | 1.89  | 23.76 | Nil    |     |
| 18   |             |      |     | Nil     | 2.44  | Nil   | Nil  | Nil   | Nil     | Nil   | 3.45  | 42.07 | Nil    |     |
| 21   | 90          | 10   | 3   | Nil     | Nil   | 45    | Nil  | Nil   | Nil     | Nil   | 5.56  | Nil   | Nil    | 4   |
| 51   |             |      |     | Nil     | 1.41  | 5.41  | Nil  | Nil   | Nil     | Nil   | 1.82  | Nil   | Nil    |     |
| 130  |             |      |     | Nil     | 8.7   | 3.23  | Nil  | Nil   | Nil     | 2.28  | 5.65  | Nil   | Nil    |     |
| 257  |             |      |     | Nil     | 9.7   | 9.62  | Nil  | Nil   | Nil     | Nil   | Nil   | Nil   | Nil    |     |
| 436  |             |      |     | 17.5    | 22.73 | 16.18 | Nil  | Nil   | Nil     | 9.39  | 2.89  | Nil   | Nil    |     |
| 442  |             |      |     | Nil     | 9.23  | 5.45  | Nil  | Nil   | Nil     | Nil   | Nil   | Nil   | Nil    |     |
| 757  |             |      |     | Nil     | 1     | 4.84  | Nil  | Nil   | Nil     | 5.7   | 2.31  | Nil   | Nil    |     |
| 864  |             |      |     | Nil     | 1.25  | 32.73 | Nil  | 1.3   | Nil     | 10.67 | 15.71 | 1.05  | Nil    |     |
| 877  |             |      |     | Nil     | 15.48 | 29.17 | Nil  | Nil   | Nil     | Nil   | Nil   | Nil   | Nil    |     |
| 173  |             |      |     | 26.13   | 24.95 | 20.09 | 24.9 | 27.52 | 25      | 22.97 | 25.22 | 23.41 | 22.88  |     |
| 435  |             |      |     | 25.63   | 31.81 | 36.57 | 29   | Nil   | 28.64   | 29.41 | 25.43 | 28.61 | Nil    |     |
| 575  |             |      |     | 30.15   | 29.61 | 33.73 | 30.1 | 35.18 | 19.42   | 19.1  | 22.03 | Nil   | 20.2   |     |
| 11   |             |      |     | Nil     | Nil   | Nil   | Nil  | Nil   | Nil     | 1.09  | Nil   | 41.2  | Nil    |     |
| 14   |             |      |     | Nil     | 1.03  | 3.33  | Nil  | Nil   | Nil     | Nil   | Nil   | Nil   | Nil    |     |
| 16   |             |      |     | Nil     | 5.36  | 2.94  | Nil  | Nil   | Nil     | Nil   | Nil   | Nil   | Nil    |     |
| 17   |             |      |     | Nil     | 4.17  | 6.12  | Nil  | Nil   | Nil     | Nil   | Nil   | Nil   | Nil    |     |
| 18   |             |      |     | Nil     | Nil   | 1.92  | Nil  | Nil   | Nil     | Nil   | 2.33  | Nil   | Nil    |     |
| 21   | 75          | 25   | 5   | Nil     | 1.42  | 13.46 | Nil  | 1.48  | Nil     | Nil   | 2.56  | Nil   | Nil    |     |
| 51   |             |      |     | Nil     | Nil   | 4.44  | Nil  | Nil   | Nil     | Nil   | Nil   | Nil   | Nil    |     |
| 130  |             |      |     | Nil     | 5.88  | 6.15  | Nil  | Nil   | Nil     | 1.7   | 6.17  | Nil   | Nil    | 6   |
| 257  |             |      |     | Nil     | 2.59  | 2.4   | Nil  | Nil   | Nil     | Nil   | Nil   | Nil   | Nil    |     |
| 436  |             |      |     | 13.4    | 15.92 | 17.7  | Nil  | Nil   | Nil     | 7.89  | 2.65  | Nil   | Nil    |     |
| 442  |             |      |     | Nil     | 4.83  | 5.67  | Nil  | Nil   | Nil     | Nil   | Nil   | Nil   | Nil    |     |
| 757  |             |      |     | Nil     | Nil   | 2.54  | Nil  | Nil   | Nil     | 6.42  | 5.93  | Nil   | Nil    |     |
| 864  |             |      |     | Nil     | 1.52  | 20.8  | Nil  | Nil   | Nil     | 10.09 | 5.26  | Nil   | Nil    |     |
| 877  |             |      |     | Nil     | 17.9  | 33.3  | Nil  | Nil   | Nil     | Nil   | 5.56  | Nil   | Nil    |     |
| 173  |             |      |     | 72.43   | 67.17 | 71.24 | 68   | 66.81 | 73.71   | 68.67 | 74.24 | 68.96 | 68.69  |     |
| 435  |             |      |     | 79.46   | 79.34 | 75.91 | 79.3 | Nil   | 78.68   | 78.18 | 75.17 | 78.56 | 78.38  |     |
| 575  |             |      |     | 68.15   | 66.93 | 69.58 | 67   | Nil   | 69.41   | 66.59 | 71.36 | 67.43 | Nil    |     |
| 11   |             |      |     | Nil     | Nil   | 3.33  | Nil  | Nil   | Nil     | Nil   | 4     | 39.55 | Nil    |     |
| 14   |             |      |     | Nil     | Nil   | Nil   | 21.3 | Nil   | Nil     | Nil   | Nil   | 22.24 | Nil    |     |
| 16   |             |      |     | Nil     | Nil   | 11.36 | Nil  | Nil   | Nil     | Nil   | 3.23  | Nil   | Nil    |     |
| 17   |             |      |     | Nil     | 1.05  | 1.67  | 20.7 | Nil   | Nil     | 1.04  | 2.33  | Nil   | Nil    |     |
| 18   |             |      |     | Nil     | Nil   | 1.64  | 35.1 | Nil   | Nil     | Nil   | 2.13  | Nil   | Nil    |     |
| 21   | 25          | 75   | 7   | Nil     | Nil   | 3.33  | Nil  | Nil   | Nil     | Nil   | 2.22  | Nil   | Nil    | 8   |
| 51   |             |      |     | Nil     | Nil   | Nil   | Nil  | Nil   | Nil     | Nil   | Nil   | Nil   | Nil    |     |
| 130  |             |      |     | Nil     | Nil   | 1.69  | Nil  | Nil   | Nil     | 1.23  | 2.5   | Nil   | Nil    |     |
| 257  |             |      |     | Nil     | Nil   | Nil   | Nil  | Nil   | Nil     | Nil   | Nil   | Nil   | Nil    |     |
| 436  |             |      |     | Nil     | 2.64  | 1.03  | Nil  | Nil   | Nil     | 2.72  | 1.19  | Nil   | Nil    |     |
| 442  |             |      |     | Nil     | Nil   | Nil   | Nil  | Nil   | Nil     | Nil   | Nil   | Nil   | Nil    |     |
| 757  |             |      |     | Nil     | 6.2   | 4.64  | Nil  | Nil   | Nil     | 4.15  | 2.58  | Nil   | Nil    |     |
| 864  |             |      |     | Nil     | 9.91  | 7.69  | Nil  | Nil   | Nil     | 11.38 | 12.2  | 1.16  | Nil    |     |
| 877  |             |      |     | Nil     | Nil   | Nil   | Nil  | Nil   | Nil     | Nil   | Nil   | Nil   | Nil    |     |
| 173  |             |      |     | 90.45   | 83.52 | 87.18 | 84.2 | 83.2  | 89.22   | 82.22 | 85.29 | 82.45 | 82.02  |     |
| 435  |             |      |     | 91.37   | 91.85 | 91.75 | Nil  | 91.89 | 92.33   | 92.4  | 90.47 | Nil   | 92.39  |     |
| 575  |             |      |     | 87.56   | 85.25 | 85.4  | 85.7 | Nil   | 85.33   | 83.07 | 86.78 | 84.29 | 85.64  |     |
| 11   |             |      |     | Nil     | Nil   | 4.76  | Nil  | Nil   | Nil     | Nil   | 11.11 | 48.51 | Nil    |     |
| 14   |             |      |     | Nil     | Nil   | Nil   | Nil  | Nil   | Nil     | Nil   | Nil   | Nil   | Nil    |     |
| 16   |             |      |     | Nil     | Nil   | 7.69  | Nil  | Nil   | Nil     | Nil   | Nil   | Nil   | Nil    |     |
| 17   |             |      |     | Nil     | 1.47  | 2.94  | 27.7 | Nil   | Nil     | Nil   | Nil   | 26.41 | Nil    |     |
| 18   |             |      |     | Nil     | 1.01  | 2.7   | 41.8 | Nil   | Nil     | Nil   | Nil   | 43.17 | Nil    |     |
| 21   | 10          | 90   | 9   | Nil     | Nil   | Nil   | Nil  | Nil   | Nil     | Nil   | Nil   | Nil   | Nil    | 10  |
| 51   |             |      |     | Nil     | Nil   | 1.06  | 20.1 | Nil   | Nil     | Nil   | 1.23  | Nil   | Nil    |     |
| 130  |             |      |     | Nil     | 2     | 5.6   | 23.6 | Nil   | Nil     | 1.7   | 1.3   | Nil   | Nil    |     |
| 257  |             |      |     | Nil     | Nil   | Nil   | Nil  | Nil   | Nil     | Nil   | Nil   | Nil   | Nil    |     |
| 436  |             |      |     | Nil     | 1.08  | Nil   | Nil  | Nil   | Nil     | Nil   | Nil   | Nil   | Nil    |     |
| 442  |             |      |     | Nil     | Nil   | Nil   | Nil  | Nil   | Nil     | Nil   | Nil   | Nil   | Nil    |     |
| 757  |             |      |     | Nil     | 6.65  | 4.72  | Nil  | Nil   | Nil     | 7.2   | 3.53  | Nil   | Nil    |     |
| 864  |             |      |     | Nil     | 9.16  | 8.7   | Nil  | Nil   | Nil     | 9.67  | 14.71 | 1.22  | Nil    |     |
| 877  |             |      |     | Nil     | 1.1   | 3.7   | Nil  | Nil   | Nil     | Nil   | 11.76 | Nil   | Nil    |     |

# Nil: below 1% detection threshold
