# Supplementary material for: Quick, sensitive and specific detection and evaluation of quantification of minor variants by high-throughput sequencing
Source: Royal Society of Chemistry journal article supplement (doi:10.1039/c3mb70334g), 2013-10-30
Supplement: c3mb70334g_6.pdf [file c3mb70334g_6.pdf]

Table S4. Validation experimental results for minor variant authentication by HA gene segment

| Gene | Site  | Run   | Minor Var% |       |       |       |        |        | CV     | Clone*             | Homo†           |
|------|-------|-------|------------|-------|-------|-------|--------|--------|--------|--------------------|-----------------|
|      |       |       | DiBayes    | TMAP  | BWA   | SNVer | Lofreq | Mapper |        |                    |                 |
| HA   | 8     | Run11 | Nil        | Nil   | Nil   | Nil   | Nil    | Nil    | N/A    | Nil                |                 |
|      |       | Run12 | Nil        | Nil   | Nil   | Nil   | Nil    | Nil    | N/A    |                    |                 |
|      |       | Run13 | Nil        | 3.98  | Nil   | 21.48 | 4.10   | Nil    | 1.022  |                    |                 |
|      |       | Run14 | Nil        | Nil   | Nil   | Nil   | Nil    | Nil    | N/A    |                    |                 |
|      | 206   | Run11 | Nil        | 5.35  | 5.95  | Nil   | 5.25   | Nil    | 0.069  | 2G 10A             |                 |
|      |       | Run12 | 5.02       | 4.93  | 5.40  | Nil   | 4.92   | Nil    | 0.045  |                    |                 |
|      |       | Run13 | 4.52       | 4.30  | 4.13  | Nil   | Nil    | Nil    | 0.045  |                    |                 |
|      |       | Run14 | Nil        | Nil   | Nil   | Nil   | Nil    | Nil    | N/A    |                    |                 |
|      | 275   | Run11 | 8.66       | 19.20 | 15.13 | 14.32 | 19.22  | Nil    | 0.284  | 2C 10T             | 3C<br>(275-277) |
|      |       | Run12 | 10.64      | 17.19 | 16.39 | 13.64 | 17.35  | Nil    | 0.191  |                    |                 |
|      |       | Run13 | 10.31      | 16.63 | 15.37 | 12.46 | 16.54  | Nil    | 0.195  |                    |                 |
|      |       | Run14 | 21.56      | 21.56 | 24.72 | 17.95 | 24.55  | 20.00  | 0.125  |                    |                 |
|      | 333   | Run11 | 12.47      | 11.88 | 13.15 | Nil   | 12.08  | Nil    | 0.045  | Nil                | 3A<br>(332-334) |
|      |       | Run12 | 9.06       | 8.99  | 9.38  | Nil   | 8.91   | Nil    | 0.023  |                    |                 |
|      |       | Run13 | 9.30       | 9.14  | 10.18 | Nil   | 9.06   | Nil    | 0.055  |                    |                 |
|      |       | Run14 | 10.69      | 10.66 | 9.65  | Nil   | Nil    | Nil    | 0.057  |                    |                 |
|      | 509   | Run11 | Nil        | Nil   | Nil   | Nil   | Nil    | Nil    | N/A    | Nil                | 5T<br>(509-513) |
|      |       | Run12 | Nil        | Nil   | Nil   | Nil   | Nil    | Nil    | N/A    |                    |                 |
|      |       | Run13 | 7.60       | 7.11  | 6.21  | Nil   | Nil    | Nil    | 0.101  |                    |                 |
|      |       | Run14 | Nil        | Nil   | Nil   | Nil   | Nil    | Nil    | N/A    |                    |                 |
|      | 527   | Run11 | 38.96      | 41.01 | 41.51 | 39.27 | 41.62  | Nil    | 0.031  | 5A 7T              |                 |
|      |       | Run12 | 37.55      | 38.31 | 35.30 | 38.30 | 38.55  | Nil    | 0.036  |                    |                 |
|      |       | Run13 | 36.53      | 40.62 | 38.94 | 38.85 | 40.73  | Nil    | 0.044  |                    |                 |
|      |       | Run14 | 39.03      | 38.78 | 40.37 | 43.54 | 40.37  | 40.00  | 0.047  |                    |                 |
|      | 627   | Run11 | 23.16      | 27.74 | 25.00 | 24.42 | 27.24  | Nil    | 0.076  | 2C 10T             |                 |
|      |       | Run12 | 11.61      | 14.48 | 13.15 | 13.69 | 14.41  | Nil    | 0.087  |                    |                 |
|      |       | Run13 | 15.14      | 17.72 | 19.26 | 16.08 | 17.87  | Nil    | 0.094  |                    |                 |
|      |       | Run14 | 16.92      | 17.18 | 18.23 | 16.17 | 18.06  | 18.00  | 0.049  |                    |                 |
|      | 651   | Run11 | Nil        | 1.65  | 1.03  | Nil   | 1.67   | Nil    | 0.251  | Nil                |                 |
|      |       | Run12 | Nil        | Nil   | Nil   | Nil   | Nil    | Nil    | N/A    |                    |                 |
|      |       | Run13 | Nil        | 3.53  | Nil   | Nil   | 3.58   | Nil    | 0.010  |                    |                 |
|      |       | Run14 | Nil        | 1.22  | Nil   | Nil   | 2.53   | Nil    | 0.494  |                    |                 |
|      | 750   | Run11 | Nil        | 14.77 | 15.93 | Nil   | 14.38  | Nil    | 0.054  | 1A 11G             |                 |
|      |       | Run12 | 8.78       | 11.42 | 12.17 | Nil   | 11.16  | Nil    | 0.135  |                    |                 |
|      |       | Run13 | 5.88       | 11.01 | 10.73 | Nil   | 10.77  | Nil    | 0.259  |                    |                 |
|      |       | Run14 | 12.14      | 12.10 | 14.18 | Nil   | 14.47  | Nil    | 0.097  |                    |                 |
|      | 881   | Run11 | 19.62      | 17.28 | 19.97 | Nil   | 17.02  | Nil    | 0.083  | 1T 11C             |                 |
|      |       | Run12 | 14.67      | 13.73 | 14.77 | Nil   | 13.66  | Nil    | 0.042  |                    |                 |
|      |       | Run13 | 14.00      | 13.26 | 13.24 | Nil   | 13.15  | Nil    | 0.029  |                    |                 |
|      |       | Run14 | 13.72      | 13.68 | 14.52 | Nil   | 14.36  | Nil    | 0.031  |                    |                 |
| 1065 | Run11 | 15.64 | 14.84      | 16.12 | Nil   | 14.45 | Nil    | 0.050  | 1A 11C |                    |                 |
|      | Run12 | 13.17 | 13.24      | 13.14 | Nil   | 13.08 | Nil    | 0.005  |        |                    |                 |
|      | Run13 | 13.11 | 13.39      | 13.89 | Nil   | 13.22 | Nil    | 0.026  |        |                    |                 |
|      | Run14 | 13.38 | 13.33      | 14.53 | Nil   | 13.83 | Nil    | 0.040  |        |                    |                 |
| 1089 | Run11 | 7.33  | 6.44       | 8.01  | Nil   | 6.32  | Nil    | 0.113  | 4G 8A  |                    |                 |
|      | Run12 | 8.40  | 8.21       | 8.36  | Nil   | 8.14  | Nil    | 0.015  |        |                    |                 |
|      | Run13 | 6.82  | 7.00       | 6.66  | Nil   | 6.96  | Nil    | 0.022  |        |                    |                 |
|      | Run14 | 10.65 | 10.58      | 12.57 | Nil   | 11.05 | Nil    | 0.083  |        |                    |                 |
| 1387 | Run11 | 33.85 | 30.30      | 24.21 | 27.55 | 32.33 | Nil    | 0.130  | 5A 7G  |                    |                 |
|      | Run12 | 35.27 | 27.90      | 28.31 | 30    | 28.78 | Nil    | 0.101  |        |                    |                 |
|      | Run13 | 42.49 | 37.09      | 36.66 | 40.46 | 37.10 | Nil    | 0.067  |        |                    |                 |
|      | Run14 | 41.55 | 41.59      | 40.58 | 49.64 | 40.86 | 43.00  | 0.089  |        |                    |                 |
| 1540 | Run11 | Nil   | Nil        | Nil   | Nil   | Nil   | Nil    | N/A    | Nil    | 3C<br>(1539 -1541) |                 |
|      | Run12 | 4.25  | 4.18       | Nil   | Nil   | 3.79  | Nil    | 0.061  |        |                    |                 |
|      | Run13 | Nil   | Nil        | Nil   | Nil   | Nil   | Nil    | N/A    |        |                    |                 |
|      | Run14 | Nil   | Nil        | Nil   | Nil   | Nil   | Nil    | N/A    |        |                    |                 |
| 1547 | Run11 | Nil   | Nil        | Nil   | Nil   | Nil   | Nil    | N/A    | Nil    |                    |                 |
|      | Run12 | 5.93  | 5.11       | Nil   | Nil   | 4.60  | Nil    | 0.129  |        |                    |                 |
|      | Run13 | Nil   | Nil        | Nil   | Nil   | Nil   | Nil    | N/A    |        |                    |                 |
|      | Run14 | Nil   | Nil        | Nil   | Nil   | Nil   | Nil    | N/A    |        |                    |                 |
| 1551 | Run11 | Nil   | Nil        | Nil   | Nil   | Nil   | Nil    | N/A    | Nil    | 5G<br>(1670-1674)  |                 |
|      | Run12 | 4.39  | 3.79       | Nil   | Nil   | 3.59  | Nil    | 0.106  |        |                    |                 |
|      | Run13 | Nil   | Nil        | Nil   | Nil   | Nil   | Nil    | N/A    |        |                    |                 |
|      | Run14 | Nil   | Nil        | Nil   | Nil   | Nil   | Nil    | N/A    |        |                    |                 |
| 1760 | Run11 | Nil   | Nil        | Nil   | Nil   | Nil   | Nil    | N/A    | Nil    |                    |                 |
|      | Run12 | 9.36  | 8.61       | Nil   | Nil   | 8.57  | Nil    | 0.050  |        |                    |                 |
|      | Run13 | Nil   | Nil        | Nil   | Nil   | Nil   | Nil    | N/A    |        |                    |                 |
|      | Run14 | Nil   | Nil        | Nil   | Nil   | Nil   | Nil    | N/A    |        |                    |                 |

\*T-A Clone, about 10~12 clones were picked

† Homopolymer Region
