# Supplementary material for: Quick, sensitive and specific detection and evaluation of quantification of minor variants by high-throughput sequencing
Source: Royal Society of Chemistry journal article supplement (doi:10.1039/c3mb70334g), 2013-10-30
Supplement: c3mb70334g_7.pdf [file c3mb70334g_7.pdf]

| Gene | Site  | Run   | Minor Var% |       |       |       |        | CV    | Clone* | Homo†             |                 |
|------|-------|-------|------------|-------|-------|-------|--------|-------|--------|-------------------|-----------------|
|      |       |       | DiBays     | TMAP  | BWA   | SNVer | Lofreq |       |        |                   | Mapper          |
| NS   | 173   | Run11 | 54.04      | 50.84 | 50.78 | 52.97 | 51.48  | Nil   | 0.028  | 4T 6C             |                 |
|      |       | Run12 | 56.12      | 54.75 | 55.74 | Nil   | 54.43  | Nil   | 0.014  |                   |                 |
|      |       | Run13 | 50.92      | 49.08 | 50.09 | 50.97 | 48.78  | Nil   | 0.020  |                   |                 |
|      |       | Run14 | 57.58      | 57.58 | 57    | 61.10 | 58.61  | 40.00 | 0.028  |                   |                 |
|      | 176   | Run11 | 4.3        | 4.13  | 3.57  | Nil   | 4.23   | Nil   | 0.082  | Nil               |                 |
|      |       | Run12 | 4.25       | 4.16  | 4.21  | Nil   | 4.11   | Nil   | 0.015  |                   |                 |
|      |       | Run13 | 4.36       | 4.26  | 4.33  | Nil   | 4.06   | Nil   | 0.032  |                   |                 |
|      |       | Run14 | 6.56       | 6.55  | 6.16  | Nil   | Nil    | Nil   | 0.036  |                   |                 |
|      | 412   | Run11 | 5.07       | 5.1   | Nil   | Nil   | 4.85   | Nil   | 0.027  | Nil               |                 |
|      |       | Run12 | Nil        | 2.7   | Nil   | Nil   | 2.2    | Nil   | 0.144  |                   |                 |
|      |       | Run13 | Nil        | Nil   | Nil   | Nil   | Nil    | Nil   | N/A    |                   |                 |
|      |       | Run14 | Nil        | Nil   | Nil   | Nil   | Nil    | Nil   | N/A    |                   |                 |
|      | 575   | Run11 | 51.25      | 52.52 | 54.48 | 52.25 | 55.15  | Nil   | 0.031  | 4A 6G             | 5G<br>(573-577) |
|      |       | Run12 | 52.81      | 53.43 | 54.88 | Nil   | 53.96  | Nil   | 0.016  |                   |                 |
|      |       | Run13 | 49.52      | 51.74 | 54.37 | 51.10 | Nil    | Nil   | 0.039  |                   |                 |
|      |       | Run14 | 54.09      | 54.09 | 54.42 | Nil   | 55.65  | 51.00 | 0.014  |                   |                 |
|      | 616   | Run11 | 4.19       | 3.57  | Nil   | Nil   | 3.59   | Nil   | 0.093  | Nil               |                 |
|      |       | Run12 | Nil        | 2.97  | Nil   | Nil   | Nil    | Nil   | N/A    |                   |                 |
|      |       | Run13 | Nil        | 6.74  | 5.57  | Nil   | Nil    | Nil   | 0.134  |                   |                 |
|      |       | Run14 | Nil        | Nil   | Nil   | Nil   | Nil    | Nil   | N/A    |                   |                 |
| 864  | Run11 | Nil   | Nil        | Nil   | Nil   | Nil   | Nil    | N/A   | Nil    | 3G<br>(864-866)   |                 |
|      | Run12 | Nil   | Nil        | Nil   | Nil   | Nil   | Nil    | N/A   |        |                   |                 |
|      | Run13 | Nil   | 13.51      | 25.56 | 5.63  | Nil   | Nil    | 0.674 |        |                   |                 |
|      | Run14 | Nil   | 1.93       | 6.65  | Nil   | Nil   | Nil    | 0.778 |        |                   |                 |
| NA   | 8     | Run11 | Nil        | Nil   | Nil   | Nil   | Nil    | Nil   | N/A    | Nil               |                 |
|      |       | Run12 | Nil        | Nil   | Nil   | Nil   | Nil    | Nil   | N/A    |                   |                 |
|      |       | Run13 | Nil        | Nil   | Nil   | Nil   | 5.12   | Nil   | N/A    |                   |                 |
|      |       | Run14 | Nil        | Nil   | Nil   | Nil   | Nil    | Nil   | N/A    |                   |                 |
|      | 9     | Run11 | Nil        | Nil   | Nil   | Nil   | Nil    | Nil   | N/A    | Nil               |                 |
|      |       | Run12 | Nil        | Nil   | Nil   | Nil   | Nil    | Nil   | N/A    |                   |                 |
|      |       | Run13 | Nil        | Nil   | Nil   | Nil   | 5.11   | Nil   | N/A    |                   |                 |
|      |       | Run14 | Nil        | Nil   | Nil   | Nil   | Nil    | Nil   | N/A    |                   |                 |
|      | 194   | Run11 | Nil        | Nil   | Nil   | Nil   | Nil    | Nil   | N/A    | Nil               |                 |
|      |       | Run12 | Nil        | Nil   | Nil   | Nil   | Nil    | Nil   | N/A    |                   |                 |
|      |       | Run13 | Nil        | Nil   | 3.82  | Nil   | Nil    | Nil   | N/A    |                   |                 |
|      |       | Run14 | Nil        | Nil   | 10.58 | Nil   | Nil    | Nil   | N/A    |                   |                 |
|      | 375   | Run11 | Nil        | Nil   | Nil   | Nil   | Nil    | Nil   | N/A    | Nil               |                 |
|      |       | Run12 | Nil        | 1.51  | 3.01  | Nil   | Nil    | Nil   | 0.469  |                   |                 |
|      |       | Run13 | Nil        | 1.57  | 1.56  | Nil   | Nil    | Nil   | 0.005  |                   |                 |
|      |       | Run14 | Nil        | Nil   | 8.71  | Nil   | Nil    | Nil   | N/A    |                   |                 |
|      | 412   | Run11 | Nil        | Nil   | Nil   | Nil   | Nil    | Nil   | N/A    | Nil               |                 |
|      |       | Run12 | Nil        | 2.20  | 2.61  | 1.53  | Nil    | Nil   | 0.258  |                   |                 |
|      |       | Run13 | Nil        | Nil   | Nil   | 1.01  | 1.91   | Nil   | 0.436  |                   |                 |
|      |       | Run14 | Nil        | Nil   | Nil   | Nil   | Nil    | Nil   | N/A    |                   |                 |
| 486  | Run11 | 4.55  | 4.95       | Nil   | Nil   | 4.80  | Nil    | 0.042 | Nil    |                   |                 |
|      | Run12 | Nil   | 2.02       | Nil   | Nil   | Nil   | Nil    | N/A   |        |                   |                 |
|      | Run13 | Nil   | Nil        | Nil   | Nil   | Nil   | Nil    | N/A   |        |                   |                 |
|      | Run14 | Nil   | Nil        | Nil   | Nil   | Nil   | Nil    | N/A   |        |                   |                 |
| 527  | Run11 | 5.13  | 5.42       | Nil   | Nil   | 4.60  | Nil    | 0.082 | Nil    |                   |                 |
|      | Run12 | Nil   | 2.81       | Nil   | Nil   | Nil   | Nil    | N/A   |        |                   |                 |
|      | Run13 | Nil   | Nil        | Nil   | Nil   | Nil   | Nil    | N/A   |        |                   |                 |
|      | Run14 | Nil   | Nil        | Nil   | Nil   | Nil   | Nil    | N/A   |        |                   |                 |
| 531  | Run11 | 5.44  | 5.21       | Nil   | Nil   | 4.49  | Nil    | 0.098 | Nil    |                   |                 |
|      | Run12 | Nil   | 2.70       | Nil   | Nil   | Nil   | Nil    | N/A   |        |                   |                 |
|      | Run13 | Nil   | Nil        | Nil   | Nil   | Nil   | Nil    | N/A   |        |                   |                 |
|      | Run14 | Nil   | Nil        | Nil   | Nil   | Nil   | Nil    | N/A   |        |                   |                 |
| 535  | Run11 | 6.16  | 5.30       | Nil   | Nil   | Nil   | Nil    | 0.106 | Nil    |                   |                 |
|      | Run12 | Nil   | 2.75       | Nil   | Nil   | Nil   | Nil    | N/A   |        |                   |                 |
|      | Run13 | Nil   | Nil        | Nil   | Nil   | Nil   | Nil    | N/A   |        |                   |                 |
|      | Run14 | Nil   | Nil        | Nil   | Nil   | Nil   | Nil    | N/A   |        |                   |                 |
| 593  | Run11 | Nil   | 4.75       | Nil   | Nil   | Nil   | Nil    | N/A   | Nil    | 4A<br>(593-596)   |                 |
|      | Run12 | 4.66  | 4.02       | 1.45  | Nil   | Nil   | Nil    | 0.503 |        |                   |                 |
|      | Run13 | Nil   | Nil        | Nil   | Nil   | Nil   | Nil    | N/A   |        |                   |                 |
|      | Run14 | Nil   | 1.35       | 1.24  | Nil   | Nil   | Nil    | 0.060 |        |                   |                 |
| 675  | Run11 | Nil   | Nil        | Nil   | Nil   | Nil   | Nil    | N/A   | Nil    |                   |                 |
|      | Run12 | Nil   | Nil        | Nil   | Nil   | Nil   | Nil    | N/A   |        |                   |                 |
|      | Run13 | Nil   | Nil        | Nil   | Nil   | 2.04  | Nil    | N/A   |        |                   |                 |
|      | Run14 | Nil   | Nil        | Nil   | Nil   | Nil   | Nil    | N/A   |        |                   |                 |
| 1142 | Run11 | Nil   | Nil        | Nil   | Nil   | Nil   | Nil    | N/A   | Nil    |                   |                 |
|      | Run12 | Nil   | Nil        | Nil   | Nil   | Nil   | Nil    | N/A   |        |                   |                 |
|      | Run13 | Nil   | Nil        | Nil   | Nil   | Nil   | Nil    | N/A   |        |                   |                 |
|      | Run14 | Nil   | Nil        | Nil   | Nil   | 1.50  | Nil    | N/A   |        |                   |                 |
| 1173 | Run11 | Nil   | Nil        | Nil   | Nil   | Nil   | Nil    | N/A   | Nil    |                   |                 |
|      | Run12 | Nil   | Nil        | Nil   | Nil   | Nil   | Nil    | N/A   |        |                   |                 |
|      | Run13 | Nil   | Nil        | Nil   | Nil   | 4.18  | Nil    | N/A   |        |                   |                 |
|      | Run14 | Nil   | Nil        | Nil   | Nil   | Nil   | Nil    | N/A   |        |                   |                 |
| 1211 | Run11 | Nil   | Nil        | Nil   | Nil   | Nil   | Nil    | N/A   | Nil    |                   |                 |
|      | Run12 | Nil   | 2.95       | 3.20  | 2.73  | Nil   | Nil    | 0.079 |        |                   |                 |
|      | Run13 | Nil   | Nil        | Nil   | Nil   | 2.06  | Nil    | N/A   |        |                   |                 |
|      | Run14 | Nil   | Nil        | Nil   | Nil   | Nil   | Nil    | N/A   |        |                   |                 |
| 1271 | Run11 | 49.41 | 41.63      | 23.77 | 47.16 | 41.00 | Nil    | 0.248 | 4G 6A  | 3A<br>(1269-1271) |                 |
|      | Run12 | 43.30 | 37.82      | 27.88 | 41.14 | 37.35 | Nil    | 0.158 |        |                   |                 |
|      | Run13 | 49.80 | 39.96      | 29.28 | 45.84 | 38.72 | Nil    | 0.192 |        |                   |                 |
|      | Run14 | 41.74 | 41.74      | 41.96 | 35.38 | 42.06 | 37.00  | 0.072 |        |                   |                 |
| 1274 | Run11 | 35.81 | 40.92      | 22.32 | 40.32 | 44.11 | Nil    | 0.233 | 4G 6A  | 6A<br>(1273-1278) |                 |
|      | Run12 | 34.47 | 36.77      | 27.96 | 35.56 | 39.34 | Nil    | 0.122 |        |                   |                 |
|      | Run13 | 36.77 | 40.17      | 28.08 | 39.48 | 41.32 | Nil    | 0.144 |        |                   |                 |
|      | Run14 | 42.68 | 42.68      | 42.66 | 34.87 | 53.41 | 37.00  | 0.153 |        |                   |                 |
| 1275 | Run11 | 45.42 | 40.76      | 22.42 | 42.77 | 44.07 | Nil    | 0.242 | 4G 6A  | 6A<br>(1273-1278) |                 |
|      | Run12 | 40.81 | 36.89      | 28.34 | 37.87 | 38.45 | Nil    | 0.131 |        |                   |                 |
|      | Run13 | 45.70 | 41.00      | 27.89 | 42.48 | 41.35 | Nil    | 0.173 |        |                   |                 |
|      | Run14 | 42.43 | 42.43      | 43.13 | 37.00 | 55.44 | 37.00  | 0.154 |        |                   |                 |
| 1276 | Run11 | 36.62 | 39.97      | 22.61 | 36.54 | 40.92 | Nil    | 0.209 | 4G 6A  | 6A<br>(1273-1278) |                 |
|      | Run12 | 35.98 | 36.63      | 28.48 | 35.90 | 35.84 | Nil    | 0.099 |        |                   |                 |
|      | Run13 | 37.26 | 40.41      | 28.04 | 37.68 | 39.65 | Nil    | 0.136 |        |                   |                 |
|      | Run14 | 42.43 | 42.43      | 43.13 | 36.71 | 50    | 37.00  | 0.110 |        |                   |                 |
| 1307 | Run11 | Nil   | 7.46       | 10.43 | Nil   | Nil   | Nil    | 0.235 | Nil    | 5T<br>(1307-1311) |                 |
|      | Run12 | 7.67  | 5.15       | 5.80  | Nil   | Nil   | Nil    | 0.211 |        |                   |                 |
|      | Run13 | Nil   | 4.68       | 5.91  | Nil   | Nil   | Nil    | 0.164 |        |                   |                 |
|      | Run14 | Nil   | 7.72       | 9.22  | Nil   | Nil   | Nil    | 0.125 |        |                   |                 |

\*T-A Clone, about 10–12 clones were picked

† Homopolymer Region
