# Supplementary material for: Quick, sensitive and specific detection and evaluation of quantification of minor variants by high-throughput sequencing
Source: Royal Society of Chemistry journal article supplement (doi:10.1039/c3mb70334g), 2013-10-30
Supplement: c3mb70334g_8.pdf [file c3mb70334g_8.pdf]

Table S5. Differences between observed and expected mixture ratios and standard deviation of quantification within the same run

| Run | Mixed ratio % |      | Pos | DiBayes |       |         |      | TMAP   |       |         |      | BWA   |       |         |       | SNVer  |       |         |      | Lofreq |       |         |      |
|-----|---------------|------|-----|---------|-------|---------|------|--------|-------|---------|------|-------|-------|---------|-------|--------|-------|---------|------|--------|-------|---------|------|
|     | Var1          | Var2 |     | Var2 %  | Diff* | Ab diff | SD‡  | Var2 % | Diff  | Ab diff | SD   | Var2  | Diff  | Ab diff | SD    | Var2 % | Diff  | Ab diff | SD   | Var2 % | Diff  | Ab diff | SD   |
| 1   | 50            | 50   | 173 | 50.57   | 0.57  | 0.57    |      | 47.39  | -2.61 | 2.61    |      | 43.02 | -6.98 | 6.98    |       | 46.95  | -3.05 | 3.05    |      | 50.69  | 0.69  | 0.69    |      |
|     |               |      | 435 | 55.3    | 5.3   | 5.30    | 2.66 | 65.1   | 15.1  | 15.10   | 9.07 | 71.52 | 21.52 | 21.52   | 14.80 | 60     | 10    | 10      | 6.53 | Nil#   | Nil   | Nil     | 8.52 |
|     |               |      | 575 | 55.03   | 5.03  | 5.03    |      | 52.88  | 2.88  | 2.88    |      | 64.19 | 14.19 | 14.19   |       | 53.65  | 3.65  | 3.65    |      | 62.74  | 12.74 | 12.74   |      |
| 2   | 50            | 50   | 173 | 46.16   | -3.84 | 3.84    |      | 43.39  | -6.61 | 6.61    |      | 47.08 | -2.92 | 2.92    |       | 44.57  | -5.43 | 5.43    |      | 43.95  | -6.05 | 6.05    |      |
|     |               |      | 435 | 53.62   | 3.62  | 3.62    | 5.00 | 53.73  | 3.73  | 3.73    | 5.99 | 49.2  | -0.8  | 0.80    | 1.67  | 52.94  | 2.94  | 2.94    | 5.23 | 53.82  | 3.82  | 3.82    | 5.50 |
|     |               |      | 575 | 44.13   | -5.87 | 5.87    |      | 43.31  | -6.69 | 6.69    |      | 45.9  | -4.1  | 4.10    |       | 43.31  | -6.69 | 6.69    |      | 44.68  | -5.32 | 5.32    |      |
| 3   | 90            | 10   | 173 | 20.62   | 10.62 | 10.62   |      | 14.56  | 4.56  | 4.56    |      | 8     | -2    | 2.00    |       | Nil    | Nil   | Nil     |      | 16.79  | 6.79  | 6.79    |      |
|     |               |      | 435 | 12.68   | 2.68  | 2.68    | 4.43 | 20     | 10    | 10.00   | 3.95 | 40.38 | 30.38 | 30.38   | 16.58 | 14.42  | 4.42  | 4.42    | Nil  | Nil    | Nil   | Nil     | Nil  |
|     |               |      | 575 | 13.25   | 3.25  | 3.25    |      | 12.31  | 2.31  | 2.31    |      | 18.03 | 8.03  | 8.03    |       | Nil    | Nil   | Nil     |      | Nil    | Nil   | Nil     |      |
| 4   | 90            | 10   | 173 | 9.01    | -0.99 | 0.99    |      | 8.4    | -1.6  | 1.60    |      | 10.32 | 0.32  | 0.32    |       | Nil    | Nil   | Nil     |      | 8.36   | -1.64 | 1.64    |      |
|     |               |      | 435 | 12.45   | 2.45  | 2.45    | 2.32 | 13.95  | 3.95  | 3.95    | 3.31 | 11.33 | 1.33  | 1.33    | 1.11  | 12.67  | 2.67  | 2.67    | Nil  | 14.01  | 4.01  | 4.01    | 4.00 |
|     |               |      | 575 | 8.03    | -1.97 | 1.97    |      | 8.04   | -1.96 | 1.96    |      | 9.12  | -0.88 | 0.88    |       | Nil    | Nil   | Nil     |      | Nil    | Nil   | Nil     |      |
| 5   | 75            | 25   | 173 | 26.13   | 1.13  | 1.13    |      | 24.95  | -0.05 | 0.05    |      | 20.09 | -4.91 | 4.91    |       | 24.88  | -0.12 | 0.12    |      | 27.52  | 2.52  | 2.52    |      |
|     |               |      | 435 | 25.63   | 0.63  | 0.63    | 2.48 | 31.81  | 6.81  | 6.81    | 3.50 | 36.57 | 11.57 | 11.57   | 8.81  | 29.01  | 4.01  | 4.01    | 2.75 | Nil    | Nil   | Nil     | 5.42 |
|     |               |      | 575 | 30.15   | 5.15  | 5.15    |      | 29.61  | 4.61  | 4.61    |      | 33.73 | 8.73  | 8.73    |       | 30.08  | 5.08  | 5.08    |      | 35.18  | 10.18 | 10.18   |      |
| 6   | 75            | 25   | 173 | 25      | 0     | 0.00    |      | 22.97  | -2.03 | 2.03    |      | 25.22 | 0.22  | 0.22    |       | 23.41  | -1.59 | 1.59    |      | 22.88  | -2.12 | 2.12    |      |
|     |               |      | 435 | 28.64   | 3.64  | 3.64    | 4.64 | 29.41  | 4.41  | 4.41    | 5.21 | 25.43 | 0.43  | 0.43    | 0.15  | 28.61  | 3.61  | 3.61    | 3.68 | Nil    | Nil   | Nil     | 1.90 |
|     |               |      | 575 | 19.42   | -5.58 | 5.58    |      | 19.1   | -5.9  | 5.90    |      | 22.03 | -2.97 | 2.97    |       | Nil    | Nil   | Nil     |      | 20.2   | -4.8  | 4.8     |      |
| 7   | 25            | 75   | 173 | 72.43   | -2.57 | 2.57    |      | 67.17  | -7.83 | 7.83    |      | 71.24 | -3.76 | 3.76    |       | 68.02  | -6.98 | 6.98    |      | 66.81  | -8.19 | 8.19    |      |
|     |               |      | 435 | 79.46   | 4.46  | 4.46    | 5.71 | 79.34  | 4.34  | 4.34    | 7.10 | 75.91 | 0.91  | 0.91    | 3.28  | 79.26  | 4.26  | 4.26    | 6.79 | Nil    | Nil   | Nil     | Nil  |
|     |               |      | 575 | 68.15   | -6.85 | 6.85    |      | 66.93  | -8.07 | 8.07    |      | 69.58 | -5.42 | 5.42    |       | 67.04  | -7.96 | 7.96    |      | Nil    | Nil   | Nil     |      |
| 8   | 25            | 75   | 173 | 73.71   | -1.29 | 1.29    |      | 68.67  | -6.33 | 6.33    |      | 74.24 | -0.76 | 0.76    |       | 68.96  | -6.04 | 6.04    |      | 68.69  | -6.31 | 6.31    |      |
|     |               |      | 435 | 78.68   | 3.68  | 3.68    | 4.64 | 78.18  | 3.18  | 3.18    | 6.18 | 75.17 | 0.17  | 0.17    | 1.99  | 78.56  | 3.56  | 3.56    | 6.03 | 78.38  | 3.38  | 3.38    | 6.85 |
|     |               |      | 575 | 69.41   | -5.59 | 5.59    |      | 66.59  | -8.41 | 8.41    |      | 71.36 | -3.64 | 3.64    |       | 67.43  | -7.57 | 7.57    |      | Nil    | Nil   | Nil     |      |
| 9   | 10            | 90   | 173 | 90.45   | 0.45  | 0.45    |      | 83.52  | -6.48 | 6.48    |      | 87.18 | -2.82 | 2.82    |       | 84.17  | -5.83 | 5.83    |      | 83.2   | -6.8  | 6.8     |      |
|     |               |      | 435 | 91.37   | 1.37  | 1.37    | 1.99 | 91.85  | 1.85  | 1.85    | 4.40 | 91.75 | 1.75  | 1.75    | 3.28  | Nil    | Nil   | Nil     | 1.08 | 91.89  | 1.89  | 1.89    | 6.14 |
|     |               |      | 575 | 87.56   | -2.44 | 2.44    |      | 85.25  | -4.75 | 4.75    |      | 85.4  | -4.6  | 4.60    |       | 85.7   | -4.3  | 4.3     |      | Nil    | Nil   | Nil     |      |
| 10  | 10            | 90   | 173 | 89.22   | -0.78 | 0.78    |      | 82.22  | -7.78 | 7.78    |      | 85.29 | -4.71 | 4.71    |       | 82.45  | -7.55 | 7.55    |      | 82.02  | -7.98 | 7.98    |      |
|     |               |      | 435 | 92.33   | 2.33  | 2.33    | 3.51 | 92.4   | 2.4   | 2.40    | 5.65 | 90.47 | 0.47  | 0.47    | 2.67  | Nil    | Nil   | Nil     | 1.30 | 92.39  | 2.39  | 2.39    | 5.26 |
|     |               |      | 575 | 85.33   | -4.67 | 4.67    |      | 83.07  | -6.93 | 6.93    |      | 86.78 | -3.22 | 3.22    |       | 84.29  | -5.71 | 5.71    |      | 85.64  | -4.36 | 4.13    |      |

\*Difference

‡ Absolute difference

‡ standard deviation within the same run

# Nil: below 1% detection threshold
