# Supplementary material for: Quick, sensitive and specific detection and evaluation of quantification of minor variants by high-throughput sequencing
Source: Royal Society of Chemistry journal article supplement (doi:10.1039/c3mb70334g), 2013-10-30
Supplement: c3mb70334g_9.pdf [file c3mb70334g_9.pdf]

Table S6. Friedman test post hoc analysis for evaluation on difference in quantification between different variant ratios

| <b>Var 2 ratio (%)</b> |           | <b>P Value</b> |
|------------------------|-----------|----------------|
| <b>25</b>              | <b>10</b> | 0.009172732    |
| <b>50</b>              | <b>10</b> | 0.03716288     |
| <b>75</b>              | <b>10</b> | 0.945757253    |
| <b>90</b>              | <b>10</b> | 0.975683007    |
| <b>50</b>              | <b>25</b> | 0.991738919    |
| <b>75</b>              | <b>25</b> | 0.083110274    |
| <b>90</b>              | <b>25</b> | 0.056361146    |
| <b>75</b>              | <b>50</b> | 0.225640622    |
| <b>90</b>              | <b>50</b> | 0.166341711    |
| <b>90</b>              | <b>75</b> | 0.999889288    |
