# Supplementary material for: Quick, sensitive and specific detection and evaluation of quantification of minor variants by high-throughput sequencing
Source: Royal Society of Chemistry journal article supplement (doi:10.1039/c3mb70334g), 2013-10-30
Supplement: c3mb70334g_10.pdf [file c3mb70334g_10.pdf]

Table S7. TukeyHSD post-hoc analysis for evaluation on difference in quantification between different variant callers

| <b>Variant callers</b> | <b>diff</b> | <b>lwr</b> | <b>upr</b> | <b>p adj</b> |
|------------------------|-------------|------------|------------|--------------|
| <b>TMAP-DiBayes</b>    | 0.595       | -4.168195  | 5.358195   | 0.9992441    |
| <b>BWA-DiBayes</b>     | -0.488869   | -5.252064  | 4.274326   | 0.9997104    |
| <b>SNVer-DiBayes</b>   | -2.789405   | -7.5526    | 1.97379    | 0.5506732    |
| <b>Lofreq-DiBayes</b>  | 0.07        | -4.693195  | 4.833195   | 1            |
| <b>Mapper-DiBayes</b>  | -8.764464   | -13.527659 | -4.001269  | 0.0000027    |
| <b>BWA-TMAP</b>        | -1.083869   | -5.847064  | 3.679326   | 0.9870991    |
| <b>SNVer-TMAP</b>      | -3.384405   | -8.1476    | 1.37879    | 0.3266314    |
| <b>Lofreq-TMAP</b>     | -0.525      | -5.288195  | 4.238195   | 0.9995894    |
| <b>Mapper-TMAP</b>     | -9.359464   | -14.122659 | -4.596269  | 0.0000004    |
| <b>SNVer-BWA</b>       | -2.300536   | -7.063731  | 2.462659   | 0.7397076    |
| <b>Lofreq-BWA</b>      | 0.558869    | -4.204326  | 5.322064   | 0.9994428    |
| <b>Mapper-BWA</b>      | -8.275595   | -13.03879  | -3.5124    | 0.0000122    |
| <b>Lofreq-SNVer</b>    | 2.859405    | -1.90379   | 7.6226     | 0.5227199    |
| <b>Mapper-SNVer</b>    | -5.97506    | -10.738255 | -1.211864  | 0.0048054    |
| <b>Mapper-Lofreq</b>   | -8.834464   | -13.597659 | -4.071269  | 0.0000022    |
