# Supplementary material for: Quick, sensitive and specific detection and evaluation of quantification of minor variants by high-throughput sequencing
Source: Royal Society of Chemistry journal article supplement (doi:10.1039/c3mb70334g), 2013-10-30
Supplement: c3mb70334g_11.pdf [file c3mb70334g_11.pdf]

Table S8. 95% confidence intervals constructed by Agresti-Coull method for observed mixture ratios and the error from the expected actual mixture ratios

| Run | Mixed ratio % |      | Site   | 95 % Confidence interval constructed using DiBayes quantification |             |               |
|-----|---------------|------|--------|-------------------------------------------------------------------|-------------|---------------|
|     | Var1          | Var2 |        | lower bound                                                       | upper bound | minimum error |
| 2   | 50            | 50   | 173    | 44.00%                                                            | 48.30%      | 1.70%         |
|     |               |      | 435    | 51.50%                                                            | 55.70%      | 1.50%         |
|     |               |      | 575    | 41.90%                                                            | 46.30%      | 3.70%         |
| 4   | 90            | 10   | 173    | 8.00%                                                             | 10.10%      | 0%            |
|     |               |      | 435    | 11.20%                                                            | 13.80%      | 1.20%         |
|     |               |      | 575    | 7.00%                                                             | 9.20%       | 0.80%         |
| 6   | 75            | 25   | 173    | 22.70%                                                            | 27.50%      | 0%            |
|     |               |      | 435    | 26.10%                                                            | 31.20%      | 1.10%         |
|     |               |      | 575    | 17.30%                                                            | 21.80%      | 3.20%         |
| 7   | 25            | 75   | 173    | 70.40%                                                            | 74.30%      | 0.70%         |
| 435 |               |      | 77.70% | 80.90%                                                            | 2.70%       |               |
| 575 |               |      | 66.00% | 70.20%                                                            | 4.80%       |               |
| 8   |               |      | 173    | 71.40%                                                            | 75.70%      | 0%            |
| 435 |               |      | 76.60% | 80.30%                                                            | 1.60%       |               |
| 575 |               |      | 67.00% | 71.70%                                                            | 3.30%       |               |
| 9   | 10            | 90   | 173    | 88.60%                                                            | 91.90%      | 0%            |
| 435 |               |      | 89.80% | 92.60%                                                            | 0%          |               |
| 575 |               |      | 85.50% | 89.30%                                                            | 0.70%       |               |
| 10  |               |      | 173    | 87.20%                                                            | 90.90%      | 0%            |
| 435 |               |      | 90.70% | 93.70%                                                            | 0.70%       |               |
| 575 |               |      | 83.00% | 87.40%                                                            | 2.60%       |               |
